# Supplementary material
Source: PubMed Central journal article supplement (PMC5642048)
Supplement: NIHMS908851-supplement-Supp_TableS1.pdf [file NIHMS908851-supplement-Supp_TableS1.pdf]

## Supplemental Table 1

### Cycle A - CEOP Dose Modifications for Hematologic Toxicities\*

| Blood Count on Day of Treatment                        | Duration of Toxicity                  | Action                                                             | Dose upon restart                           |
|--------------------------------------------------------|---------------------------------------|--------------------------------------------------------------------|---------------------------------------------|
| Platelet < 75,000/ $\mu$ L or ANC < 700/ $\text{mm}^3$ | 1 week                                | Hold dose and recheck labs in 1 week                               | If labs recovered, then keep dose the same. |
|                                                        | 2 weeks                               | Hold dose and recheck labs in 1 week                               | If labs recovered, then keep dose the same. |
|                                                        | 3 weeks                               | Hold dose and recheck labs until adequate, then give reduced dose. | Reduce CEOP doses 25% for next Cycle A      |
|                                                        | 4 weeks or 2 <sup>nd</sup> recurrence | Stop therapy                                                       |                                             |

\* Course Once, Cycle A: Prior to receiving the initial dose of cyclophosphamide, etoposide, vincristine and prednisone (CEOP), patients must meet the laboratory parameters outlined in the eligibility criteria.

### Cycle B Pralatrexate Dose Modifications for Hematologic Toxicities

| Blood Count on Day of Treatment | Duration of Toxicity  | Action                                  | Dose upon restart                                            |
|---------------------------------|-----------------------|-----------------------------------------|--------------------------------------------------------------|
| Platelet < 50,000/ $\mu$ L      | 1 week                | Omit dose, recheck labs in 1 week.      | If labs adequate, continue at 30 $\text{mg}/\text{m}^2$ .    |
|                                 | 2 weeks               | Omit dose, recheck labs in 1 week       | If labs adequate, reduce dose to 20 $\text{mg}/\text{m}^2$ . |
|                                 | 3 weeks               | Stop therapy                            |                                                              |
| ANC < 700 $\mu$ L and no fever  | 1 week                | Omit dose, recheck labs in 1 week.      | If labs adequate, continue at 30 $\text{mg}/\text{m}^2$ .    |
| ANC < 700 $\mu$ L with fever    | 1 week                | Omit dose, give G-CSF or GM-CSF support | Continue at 30 $\text{mg}/\text{m}^2$ with G-CSF support.    |
|                                 | 2 weeks or recurrence | Omit dose, give G-CSF or GM-CSF support | Reduce dose to 20 $\text{mg}/\text{m}^2$ with G-CSF support  |
